# Supplementary material for: High dissolved organic carbon release by benthic cyanobacterial mats in a Caribbean reef ecosystem
Source: PubMed Central journal article supplement (PMC4649756; doi:10.1038/srep08852), 2015-03-09
Supplement: srep08852-s1.pdf [file srep08852-s1.pdf]

## Supplementary Information:

### **High dissolved organic carbon release by benthic cyanobacterial mats in a Caribbean reef ecosystem**

Hannah J. Brocke, Frank Wenzhoefer, Dirk de Beer, Benjamin Mueller, Fleur C. van Duyl, Maggy M. Nugues

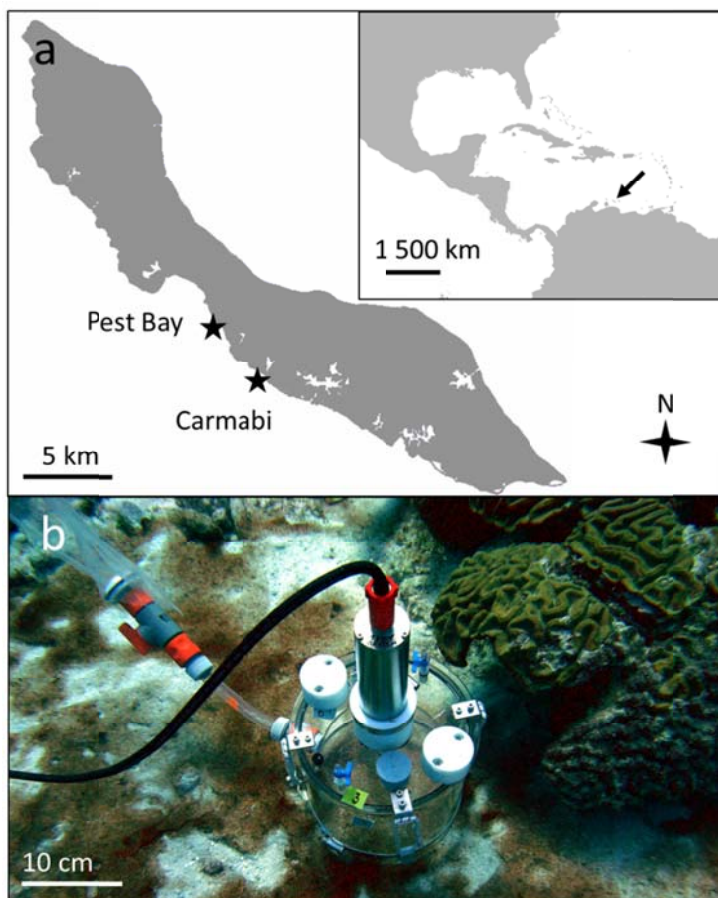

**Figure S1. (a) Map of the island Curaçao.** Stars display locations of the experimental site Pest Bay and Carmabi. *Inset* shows Central America and the Caribbean Sea. Arrow indicates the location of Curaçao. Maps produced using GeoMapApp (v.3.4.) and GIMP (v.2.8.). **(b) Photo of sediment surface and incubation chamber next to a coral head.** Carbonate sediments are covered by brown-colored BCMS.
